# Supplementary material
Source: Elsevier journal article supplement (https://www.sciencedirect.com/science/article/pii/S2238785419317405)
Supplement: mmc1 [file S2238785419317405:mmc1.docx]

**Electronic Supplementary Information**


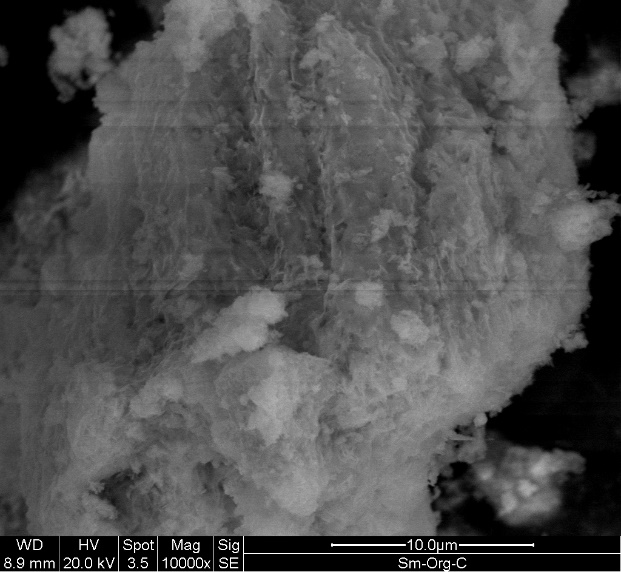

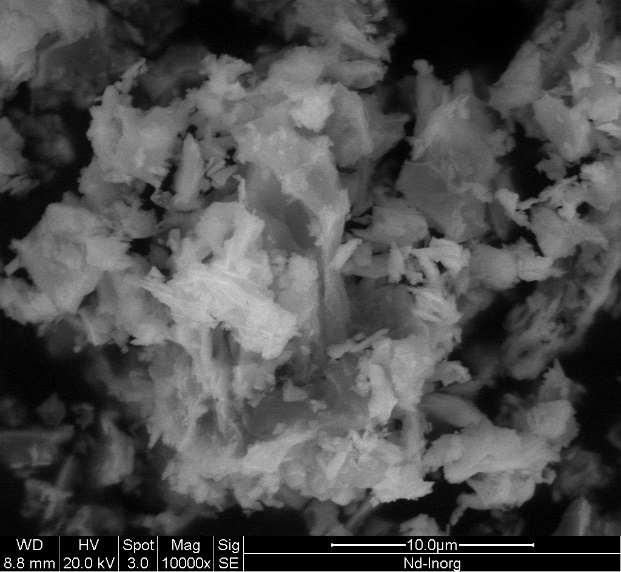


**Ho-inorg**

**100nm**


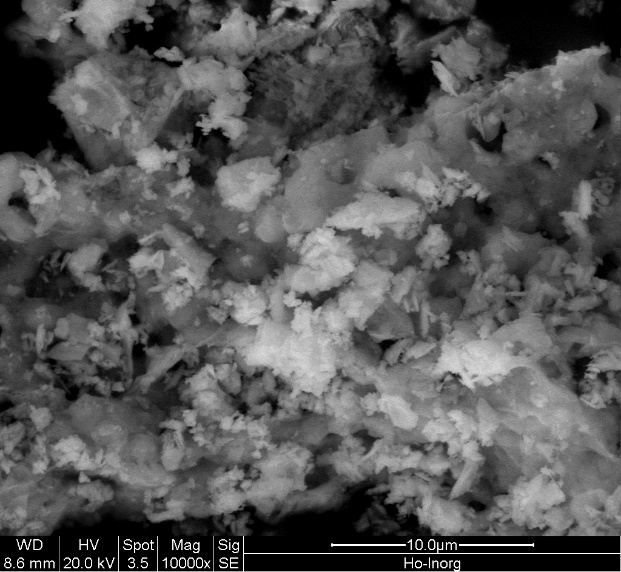


**Nd-inorg**


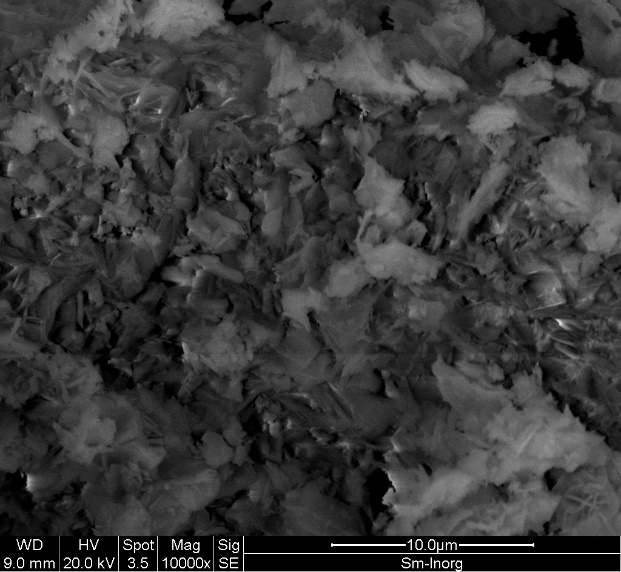


**Sm-org**

**100nm**


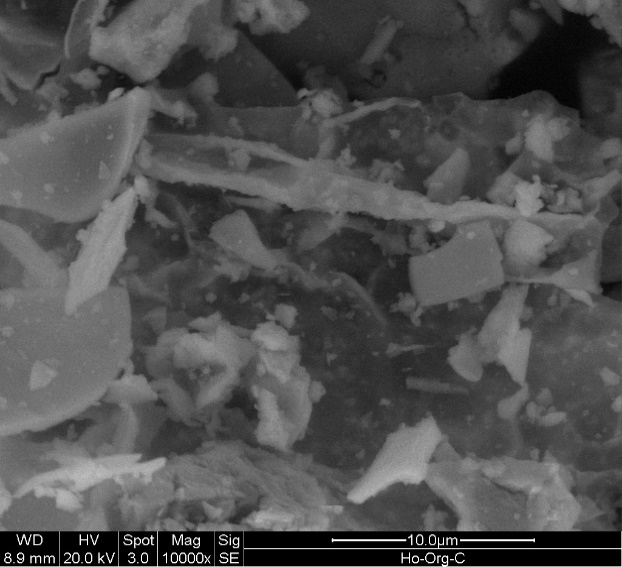


**Sm-inorg**

**100nm**


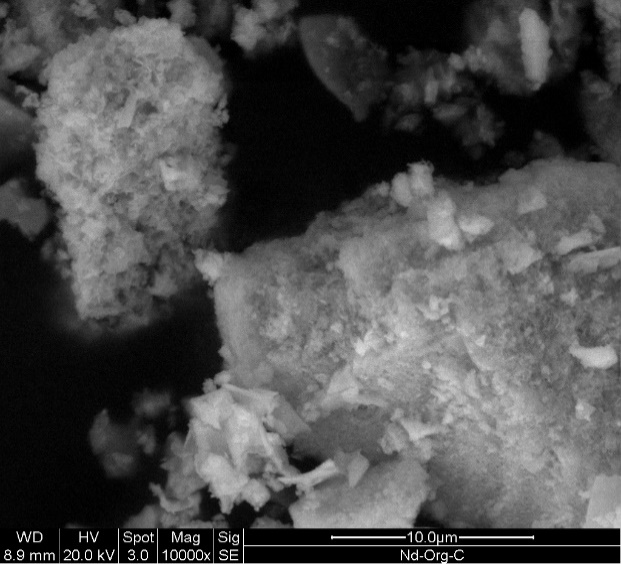


**Nd-org**

**100nm**

**Ho-org**

**100nm**

**100nm**

**Fig. S1:** SEM images of synthesized rare earth oxides using organic and inorganic routes.

**Fig. S2:** Tauc plots for synthesized rare earth oxides using organic and inorganic routes.
